# Supplementary material for: Hydrothermal synthesis of a MnOOH/three-dimensional reduced graphene oxide composite and its electrochemical properties for supercapacitors
Source: Royal Society of Chemistry journal article supplement (doi:10.1039/c5ta04851f), 2015-01-01
Supplement: c5ta04851f1.pdf [file c5ta04851f1.pdf]

**Hydrothermal synthesis of MnOOH/three dimensional  
reduced graphene oxide composite and its electrochemical  
properties for supercapacitors**

Shumin Sun\*, Shen Wang, Tongchi Xia, Xiaofeng Li, Qingxian Jin, Qiong Wu,  
Lizhen Wang, Zhenhua Wei, Peiyuan Wang\*

*Henan Provincial Key Laboratory of Surface and Interface Science, Zhengzhou  
University of Light Industry, Zhengzhou 450002, China. Tel: +86-371-86609676; E-  
mail: [smsun@zzuli.edu.cn](mailto:smsun@zzuli.edu.cn); [peiyuanwang@zzuli.edu.cn](mailto:peiyuanwang@zzuli.edu.cn)*

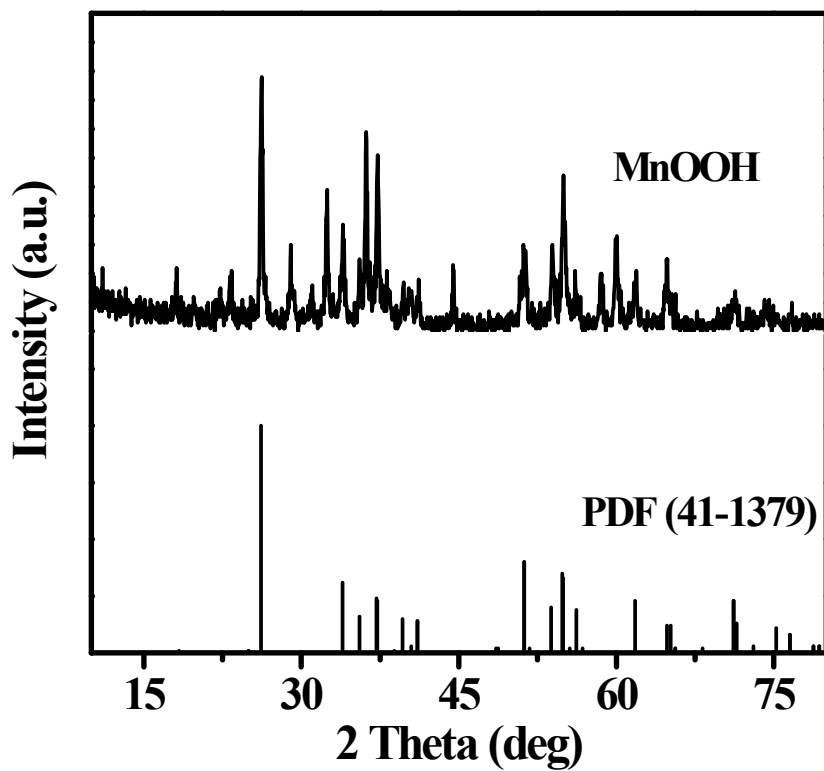

Fig. S1 XRD pattern of MnOOH

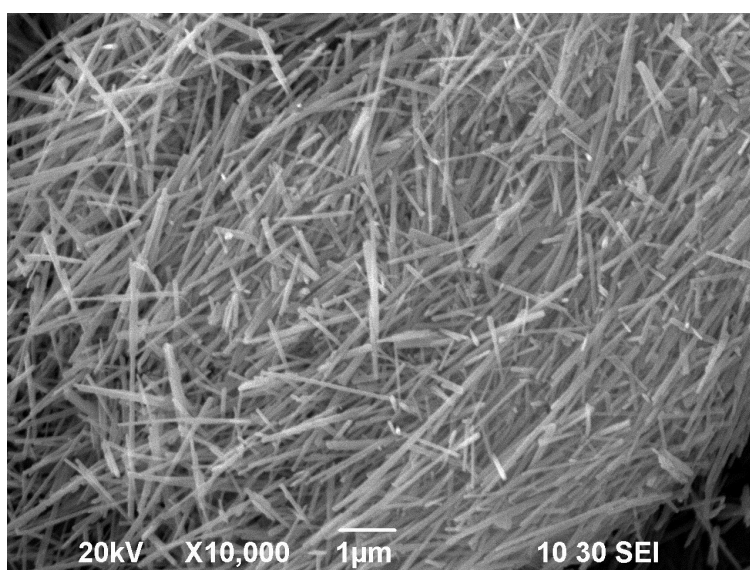

Fig. S2 SEM image of MnOOH

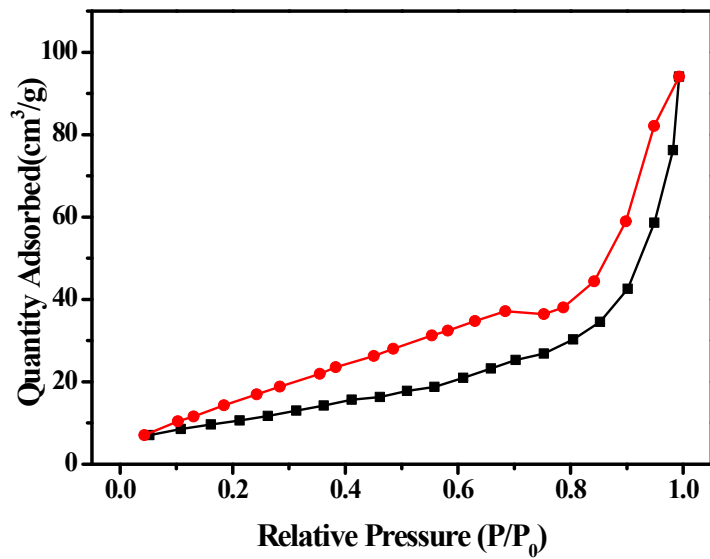

Fig. S3 Nitrogen sorption isotherm of MnOOH/3D-rGO composite

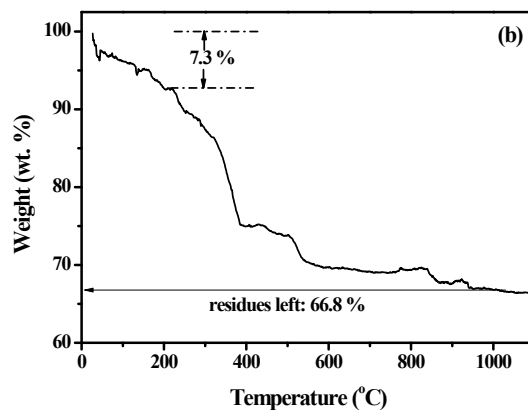

Fig. S4 TG analysis of MnOOH/3D-rGO composite.

The 3D-rGO content is 15.6 % according to the TG results. The weight loss of 7.3% between 30 and 200 °C in MnOOH/3D-rGO (Fig. S4) may be resulted from the loss of physisorbed and chemisorbed water [1]. According to the literature [2], all oxides and hydroxides of manganese can be transformed to  $Mn_3O_4$  if heated in air to about 1000 °C. It is reasonable to assume that the residue of 66.8% at 1000 °C can be attributed to pure  $Mn_3O_4$ . Then, the weight content of the MnOOH in the composite can be calculated as 77.1% based on the law of conservation of mass. Based on the above analyses, the weight content of rGO can be estimated to be 15.6% ( $100\% - 77.1\% - 7.3\% = 15.6\%$ ).

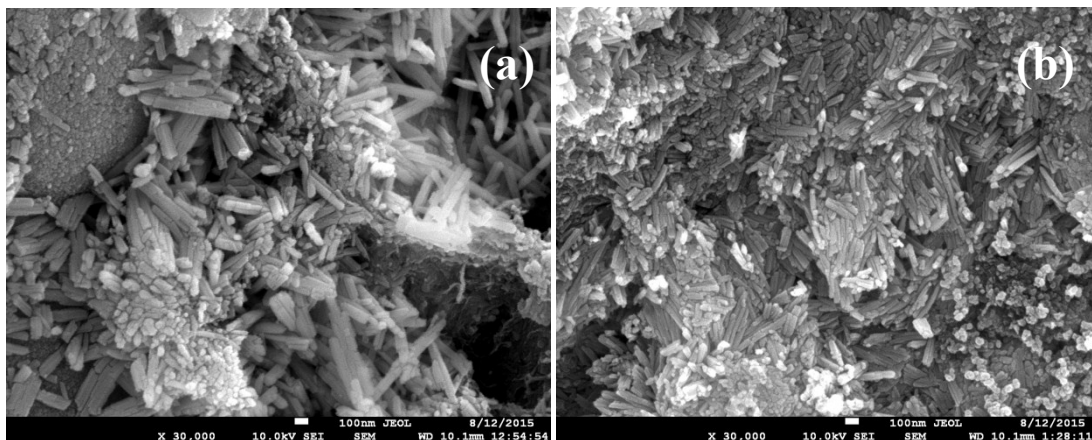

Fig. S5 SEM images of fresh (a) and used electrode (b)

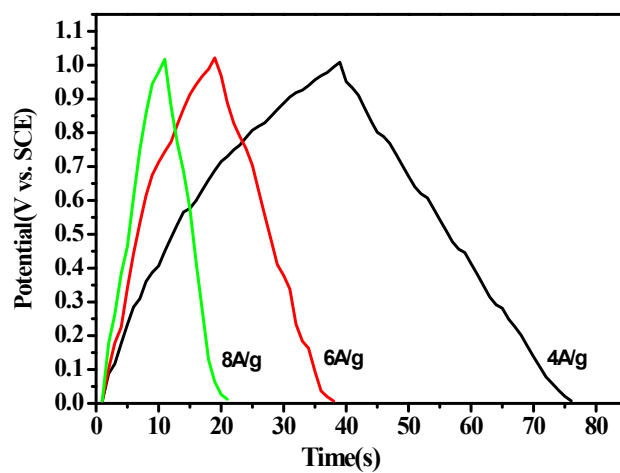

Fig. S6 Galvanostatic charge–discharge curves of the MnOOH/3D-rGO at different current densities

#### References

1. H. Fang, S. C. Zhang, X. M. Wu, W. B. Liu, B. H. Wen, Z. J. Du and T. Jiang, *J. Power Sources*, 2013, **235**, 95-104.
2. T. E. Moore, M. Ellis and P. W. Selwood, *J. Am. Chem. Soc.*, 1950, **72**, 856-866.
